# Supplementary material
Source: PubMed Central journal article supplement (PMC6349486)
Supplement: NIHMS998762-supplement-Supplementary_Tables_1_and_2.pdf [file NIHMS998762-supplement-Supplementary_Tables_1_and_2.pdf]

**Supplemental Table 1. Clinical characteristics of patients with motor functional neurological disorders.**

| FND Subject | Age | Gender | Educ. (years) | FND Subtype     | Symptom Description                                                                 | Current Psychiatric Diagnoses             | Past Psychiatric Diagnoses     | Psychotropic Medications |
|-------------|-----|--------|---------------|-----------------|-------------------------------------------------------------------------------------|-------------------------------------------|--------------------------------|--------------------------|
| 1           | 60  | M      | 18            | PNES, FW        | Episodes of behavioral arrest with altered consciousness, left arm and leg weakness | Anxiety NOS                               | MDD, LSD and Opiate Abuse      | GBP, MIR                 |
| 2           | 55  | F      | 12            | FMD, FW*        | Right arm tremor, right leg weakness                                                | MDD, PD_Ag+                               | MDD, Alcohol and Cocaine Abuse | SERT, TZD                |
| 3           | 55  | F      | 16            | FMD*            | Abnormal gait                                                                       | GAD, Undiff Somatoform                    | -                              | ZLP, ECP, GBP            |
| 4           | 49  | M      | 14            | FW              | Left arm and leg weakness                                                           | Depression NOS**, Anxiety NOS**           | -                              | -                        |
| 5           | 36  | F      | 12            | FMD, FW         | Right arm tremor, left facial weakness                                              | Dysthymia, PD_Ag-, GAD, Undiff Somatoform | MDD                            | DLX, TZD                 |
| 6           | 36  | M      | 16            | FMD*            | Head and bilateral limb tremor                                                      | -                                         | -                              | -                        |
| 7           | 26  | F      | 15            | PNES            | Episodes of behavioral arrest with altered consciousness                            | BPAD II, PD_Ag+, OCD, PTSD                | -                              | GBP, CLP, LRZ, NRT       |
| 8           | 42  | F      | 18            | FW*             | Right hand weakness                                                                 | MDD, PD_Ag-, GAD, Somatoform Pain         | Opiate Abuse                   | CLP, DVX                 |
| 9           | 44  | F      | 18            | FMD             | Abnormal gait                                                                       | -                                         | Eating Disorder NOS            | DLX                      |
| 10          | 31  | F      | 15            | FW <sup>†</sup> | Right arm and leg weakness                                                          | PTSD, OCD, Ag                             | MDD                            | -                        |

|    |    |   |    |               |                                                                                      |                                                     |                                  |                               |
|----|----|---|----|---------------|--------------------------------------------------------------------------------------|-----------------------------------------------------|----------------------------------|-------------------------------|
| 11 | 50 | F | 14 | FMD,<br>FW*†  | Abnormal gait,<br>head and bilateral<br>arm tremors, right<br>leg weakness           | PD                                                  | -                                | DLX, CLP,<br>GBP, BSP         |
| 12 | 51 | F | 14 | FMD*          | Head and four<br>limb tremor, neck<br>dystonia                                       | -                                                   | MDD                              | -                             |
| 13 | 49 | F | 14 | FMD,<br>FW*   | Left facial<br>weakness, head<br>tremor, abnormal<br>gait                            | MDD, Undiff<br>Somatoform                           | PTSD                             | DOX                           |
| 14 | 26 | F | 16 | FMD,<br>PNES* | Head and bilateral<br>arm tremor,<br>abnormal gait,<br>motor seizures                | MDD, PD_Ag+, GAD,<br>Undiff Somatoform              | -                                | CLP, VEN                      |
| 15 | 30 | F | 14 | FW†           | Four limb<br>weakness                                                                | MDD, PD_Ag+,<br>PTSD, GAD,<br>Somatization Disorder | MDD                              | APZ, CLP,<br>PGN, FLX,<br>DZP |
| 16 | 23 | F | 18 | PNES,<br>FW†  | Right arm<br>weakness, atonic<br>seizures                                            | Depression NOS,<br>Social Phobia, Alcohol<br>Abuse  | -                                | -                             |
| 17 | 22 | M | 14 | FW†           | Left arm and leg<br>weakness                                                         | Depression NOS,<br>PD_Ag-                           | -                                | -                             |
| 18 | 28 | M | 14 | PNES          | Episodes of<br>behavioral arrest<br>with altered<br>consciousness,<br>Motor seizures | Ag                                                  | Depression NOS,<br>Social Phobia | CLP                           |
| 19 | 20 | F | 14 | PNES          | Motor seizures                                                                       | PD_Ag+, Social<br>Phobia, Specific<br>Phobia, GAD   | Depression NOS                   | SERT                          |
| 20 | 50 | F | 12 | PNES          | Motor seizures                                                                       | Depression NOS,                                     | Depression NOS,                  | ATP, CLP,                     |

|    |    |   |    |                   |                                                                                     |                                                               |                                                      |                                     |
|----|----|---|----|-------------------|-------------------------------------------------------------------------------------|---------------------------------------------------------------|------------------------------------------------------|-------------------------------------|
|    |    |   |    |                   |                                                                                     | PD_Ag-, PTSD                                                  | Eating Disorder NOS,<br>Alcohol and Cocaine<br>Abuse | VPA                                 |
| 21 | 27 | F | 18 | PNES              | Motor seizures                                                                      | PD_Ag+                                                        | MDD                                                  | CLN                                 |
| 22 | 45 | M | 14 | FMD*              | Head and bilateral<br>leg tremor,<br>abnormal gait                                  | MDD                                                           | PD_Ag-                                               | THP, VPA,<br>BUP, TZD,<br>ROP, LTG  |
| 23 | 50 | M | 18 | FW                | Paroxysmal leg<br>weakness                                                          | -                                                             | PTSD                                                 | CZP                                 |
| 24 | 38 | F | 18 | FMD,<br>FW*       | Abnormal gait,<br>right arm and leg<br>weakness                                     | PD_Ag-                                                        | -                                                    | BUP,<br>DXAM/APM                    |
| 25 | 38 | F | 10 | FMD <sup>†</sup>  | Paroxysmal<br>abnormal truncal<br>and head<br>movements                             | Undiff Somatoform                                             | -                                                    | -                                   |
| 26 | 22 | F | 12 | PNES <sup>†</sup> | Motor seizures                                                                      | PTSD, GAD, Ag                                                 | MDD, Social Phobia,<br>OCD                           | VEN, FLX,<br>DZP                    |
| 27 | 42 | F | 18 | FMD               | Right arm and<br>head tremor,<br>dystonia (bilateral<br>feet)                       | Somatoform Pain<br>Disorder                                   | MDD                                                  | SERT, DZP,<br>GBP                   |
| 28 | 38 | F | 16 | FMD,<br>PNES*     | Paroxysmal<br>dystonia (bilateral<br>feet), four limb<br>tremors, motor<br>seizures | PD_Ag-, Social<br>Phobia, OCD, PTSD,<br>Somatization Disorder | MDD                                                  | CLP, LRZ,<br>MIR, SERT,<br>PGN, LTG |
| 29 | 49 | M | 13 | FW* <sup>†</sup>  | Right wrist<br>weakness                                                             | PD_Ag-, GAD                                                   | MDD                                                  | FLX, GBP,<br>DXAM/APM               |
| 30 | 50 | F | 14 | FMD,<br>PNES      | Head and bilateral<br>arm tremor, motor<br>seizures                                 | MDD, PD_Ag+,<br>PTSD, GAD, Eating<br>Disorder NOS             | Alcohol, Cocaine,<br>Opiate and Stimulants<br>Abuse  | FLX, ZLP, LRZ                       |

|    |    |   |    |                       |                                                                      |                                               |                                 |                     |
|----|----|---|----|-----------------------|----------------------------------------------------------------------|-----------------------------------------------|---------------------------------|---------------------|
| 31 | 31 | M | 14 | PNES                  | Episodes of behavioral arrest with altered consciousness             | PD_Ag-, PTSD                                  | MDD, Alcohol Abuse              | DLX, NRT, PZN       |
| 32 | 39 | F | 16 | FW* <sup>†</sup>      | Four limb weakness                                                   | PTSD, GAD, Somatization Disorder              | MDD                             | CLN                 |
| 33 | 35 | F | 12 | PNES                  | Motor seizures                                                       | -                                             | MDD                             | TPM, TZD            |
| 34 | 54 | F | 18 | FMD                   | Head tremor                                                          | Dysthymia, GAD                                | Anorexia, PD_Ag+, Social Phobia | FLX, CLP, TZD, LXAM |
| 35 | 51 | M | 14 | FMD, FW <sup>†</sup>  | Paroxysmal full body tremor, right arm and bilateral leg weakness    | MDD, PTSD, Somatoform Pain Disorder           | MDD, Social Phobia              | CLP, DLX, GBP, BZP  |
| 36 | 70 | M | 19 | FMD                   | Abnormal gait                                                        | -                                             | Anxiety NOS                     | -                   |
| 37 | 58 | F | 18 | PNES                  | Motor seizures with fear and crying                                  | Ag                                            | MDD, Alcohol Abuse              | TZD, GBP, CTP, TPM  |
| 38 | 53 | F | 16 | FMD                   | Abnormal gait                                                        | MDD, Dysthymia, GAD, Somatoform Pain Disorder | Eating Disorder NOS             | GBP, TZD, DLX       |
| 39 | 49 | F | 15 | PNES                  | Motor seizures                                                       | PD_Ag-                                        | MDD, PTSD                       | LRZ, LTG            |
| 40 | 28 | F | 16 | PNES, FW <sup>†</sup> | Motor seizures with altered consciousness, left arm and leg weakness | Dysthymia, PDwoAG, Undiff Somatoform          | PTSD, Depression NOS            | GBP                 |
| 41 | 29 | F | 18 | PNES <sup>†</sup>     | Motor seizures w/ altered consciousness                              | GAD, Specific Phobia                          | Eating Disorder NOS             | TPM                 |

|    |    |   |    |                    |                                                    |                                                      |                              |                       |
|----|----|---|----|--------------------|----------------------------------------------------|------------------------------------------------------|------------------------------|-----------------------|
| 42 | 37 | F | 18 | PNES,<br>FMD       | Motor seizures w/<br>LOC, left arm<br>tremor       | PD_Ag-, Undiff<br>Somatoform                         | PTSD, Social Phobia          | -                     |
| 43 | 34 | F | 14 | FMD,<br>FW*        | Limb weakness,<br>abnormal gait                    | BPAD II, Anxiety NOS                                 | -                            | TZD, LRZ              |
| 44 | 25 | F | 19 | FMD                | Dystonia (bilateral<br>feet)                       | Somatoform Pain<br>Disorder, Anxiety<br>NOS, BPAD II | OCD                          | DZP, GBP,<br>VTX      |
| 45 | 55 | F | 12 | PNES               | Motor seizures w/<br>LOC                           | MDD, Dysthymia,<br>PTSD                              | Social Phobia                | BUP, LRZ,<br>QTP, ZLP |
| 46 | 52 | F | 12 | FMD                | Paroxysmal head<br>and bilateral arm<br>tremors    | Depression NOS                                       | -                            | SERT                  |
| 47 | 57 | M | 12 | FMD*               | Right arm tremor                                   | OCD, Anxiety NOS                                     | MDD                          | BUP, DLX,<br>ZLP      |
| 48 | 20 | F | 14 | FMD,<br>FW         | Abnormal gait,<br>right arm tremor<br>and weakness | PD_Ag-                                               | MDD                          | -                     |
| 49 | 30 | F | 18 | FMD,<br>PNES       | Motor seizures,<br>abnormal gait                   | Anxiety NOS, Undiff<br>Somatoform                    | -                            | -                     |
| 50 | 51 | M | 19 | PNES <sup>++</sup> | Sensory<br>symptoms and<br>loss of time            | -                                                    | MDD, Anxiety NOS             | DNZ                   |
| 51 | 19 | M | 14 | FMD                | Jerking head and<br>limb movements                 | Anxiety NOS                                          | -                            | -                     |
| 52 | 48 | F | 12 | FMD                | Abnormal gait                                      | Anxiety NOS <sup>**</sup>                            | Depression NOS <sup>**</sup> | AMD, SERT,<br>LRZ     |

|    |    |   |    |               |                                                                                                     |                                                  |                                  |                    |
|----|----|---|----|---------------|-----------------------------------------------------------------------------------------------------|--------------------------------------------------|----------------------------------|--------------------|
| 53 | 31 | M | 14 | PNES          | Minor motor seizures                                                                                | PD_Ag-, Undiff Somatoform                        | PTSD, ETOH Abuse                 | PGN, PZN, DLX      |
| 54 | 20 | F | 12 | PNES          | Episodes of behavioral arrest with altered consciousness                                            | Somatization Disorder, Anxiety NOS               | Depression NOS                   | BSP, ECP, LRZ, TZD |
| 55 | 64 | F | 15 | FW*           | Generalized weakness                                                                                | PTSD, OCD, Somatization Disorder, Depression NOS | MDE, PD_Ag+, Eating Disorder NOS | DLX, MIR           |
| 56 | 29 | F | 18 | FMD, FW, PNES | Minor motor seizures with altered consciousness, abnormal gait, left arm and bilateral leg weakness | Somatization Disorder, Anxiety NOS               | -                                | GBP, LRZ           |

†Indicates that these patients had splitting of the midline functional numbness. ††Indicates that patient also had a functional cognitive disorder. \*Indicates that these patients also had functional voice symptoms. \*\*Psychiatric diagnoses made by chart review, as structured psychiatric interview not performed. M, male; F, female; NES, Nonepileptic Seizures; FW, Functional Weakness; FMD, Functional Movement Disorders; NOS, not otherwise specified; MDD, Major Depressive Disorder; PD\_Ag+, Panic Disorder with Agoraphobia; PD\_Ag-, Panic Disorder without Agoraphobia; GAD, Generalized Anxiety Disorder; Undiff Somatoform, Undifferentiated Somatoform Disorder; PTSD, Post-Traumatic Stress Disorder; OCD, Obsessive Compulsive Disorder; Ag, Agoraphobia without Panic Disorder; LOC, Loss of Consciousness; AMD,

Amantadine; APM, Amphetamine; APZ, Aripiprazole; ATP, Amitriptyline; BSP, Buspirone; BUP, Bupropion; BZP, Benzotropine; CLN, Clonidine; CLP, Clonazepam; CTP, Citalopram; CZP, Carbamazepine; DLX, Duloxetine; DNZ, donepezil; DOX, Doxepin; DVX, Desvenlafaxine; DXAM, Dextroamphetamine; DZP, Diazepam; ECP, Escitalopram; FLX, Fluoxetine; GBP, Gabapentin; LRZ, Lorazepam; LSD, Lysergic Acid Diethylamide; LTG, Lamotrigine; LXAM, Lisdexamfetamine; MIR, Mirtazapine; NRT, Nortriptyline; PGN, Pregabalin; PZN, Prazosin; QTP, Quetiapine; ROP, Ropinirole; SERT, Sertraline; THP, Trihexyphenidyl; TPM, Topiramate; TZD, Trazodone; VEN, Venlafaxine; VPA, Valproic Acid; VTX, Vortioxetine; ZLP, Zolpidem.

**Supplemental Table 2. Demographic characteristics and within group univariate associations with self-reported attachment styles (RSQ) in motor functional neurological disorders.**

|                                                  | Mean±SD   | RSQ Secure<br>Test Statistic; p-value | RSQ Fearful<br>Test Statistic; p-value | RSQ Preoccupied<br>Test Statistic; p-value | RSQ Dismissing<br>Test Statistic; p-value |
|--------------------------------------------------|-----------|---------------------------------------|----------------------------------------|--------------------------------------------|-------------------------------------------|
| Age                                              | 40.2±13.0 | 0.15; 0.28                            | -0.02; 0.91                            | -0.08; 0.55                                | 0.10; 0.48                                |
| Female (41) v. Male (15)                         | -         | 0.31; 0.76                            | 1.01; 0.32                             | -0.27; 0.79                                | -1.17; 0.25                               |
| White (51) v. Non-white (5)                      | -         | 0.74; 0.47                            | 1.21; 0.23                             | -0.48; 0.63                                | <b>-2.13; 0.04</b>                        |
| College (21) v. No College (35)                  | -         | 1.46; 0.15                            | 1.27; 0.21                             | 1.45; 0.15                                 | 1.28; 0.21                                |
| Illness Duration in years                        | 3.3±3.7   | -0.02; 0.91                           | -0.04; 0.78                            | 0.17; 0.21                                 | -0.12; 0.39                               |
| Married (23) v Not Married (33)                  | -         | 1.35; 0.18                            | <b>-2.09; 0.04</b>                     | -1.23; 0.22                                | <b>-2.41; 0.02</b>                        |
| Disabled (25) v Not Disabled (31)                | -         | 0.99; 0.33                            | -0.62; 0.54                            | -1.17; 0.25                                | 0.02; 0.99                                |
| Full Time Employed or Student (21) v. Other (35) | -         | 1.12; 0.27                            | 0.67; 0.51                             | 1.03; 0.31                                 | 0.16; 0.88                                |
| PNES (24) v. Other Motor FND                     | -         | 1.09; 0.28                            | 0.04; 0.97                             | 1.51; 0.14                                 | -0.48; 0.63                               |
| FMD (29) v. Other Motor FND                      | -         | <b>2.27; 0.03</b>                     | -0.65; 0.52                            | -0.81; 0.42                                | 0.05; 0.96                                |
| FW (21) v. Other Motor FND                       | -         | 1.03; 0.31                            | 1.52; 0.13                             | 0.48; 0.64                                 | 1.08; 0.28                                |
| SOMS:CD                                          | 8.4±7.2   | 0.18; 0.19                            | 0.15; 0.27                             | 0.03; 0.83                                 | 0.06; 0.65                                |
| PHQ-15                                           | 13.2±5.0  | -0.05; 0.74                           | <b>0.35; 0.009</b>                     | 0.15; 0.27                                 | -0.03; 0.82                               |
| SDQ-20                                           | 32.2±10.1 | 0.15; 0.28                            | <b>0.43; 0.001</b>                     | 0.08; 0.58                                 | 0.06; 0.68                                |
| SF-36 Mental                                     | 47.9±22.9 | <b>0.30; 0.03</b>                     | <b>-0.48; &lt;0.001</b>                | -0.18; 0.18                                | -0.04; 0.75                               |
| SF-36 Physical                                   | 46.4±23.1 | -0.14; 0.31                           | -0.23; 0.09                            | 0.02; 0.90                                 | -0.05; 0.71                               |
| DES                                              | 19.2±14.4 | -0.06; 0.64                           | <b>0.57; &lt;0.001</b>                 | <b>0.38; 0.004</b>                         | 0.11; 0.40                                |
| PTSD-CL5*                                        | 26.7±20.3 | <b>-0.30; 0.03</b>                    | <b>0.49; &lt;0.001</b>                 | 0.07; 0.63                                 | 0.12; 0.39                                |
| LEC 'Happened to Me'                             | 4.2±2.8   | -0.11; 0.41                           | <b>0.37; 0.005</b>                     | 0.05; 0.70                                 | 0.25; 0.06                                |
| CTQ-Abuse                                        | 28.5±13.6 | -0.23; 0.09                           | <b>0.55; &lt;0.001</b>                 | 0.23; 0.09                                 | 0.02; 0.87                                |
| CTQ-Neglect                                      | 20.3±8.8  | -0.09; 0.52                           | <b>0.34; 0.01</b>                      | 0.14; 0.30                                 | -0.13; 0.33                               |
| BDI-II                                           | 18.7±12.5 | -0.20; 0.14                           | <b>0.61; &lt;0.001</b>                 | 0.17; 0.22                                 | 0.16; 0.24                                |
| STAI-T                                           | 85.8±23.8 | <b>-0.42; 0.001</b>                   | <b>0.56; &lt;0.001</b>                 | <b>0.28; 0.04</b>                          | 0.17; 0.23                                |
| CD-RISC                                          | 64.0±16.5 | <b>0.47; &lt;0.001</b>                | <b>-0.30; 0.03</b>                     | -0.22; 0.11                                | 0.07; 0.59                                |
| TAS                                              | 56.1±13.2 | <b>-0.47; &lt;0.001</b>               | <b>0.38; 0.004</b>                     | 0.20; 0.14                                 | 0.11; 0.44                                |
| NEO-Neuroticism                                  | 25.4±9.0  | <b>-0.44; 0.001</b>                   | <b>0.48; &lt;0.001</b>                 | <b>0.34; 0.01</b>                          | 0.14; 0.30                                |



|                       |           |                        |                        |                    |             |
|-----------------------|-----------|------------------------|------------------------|--------------------|-------------|
| NEO-Extraversion      | 24.1±7.4  | <b>0.47; &lt;0.001</b> | <b>-0.40; 0.003</b>    | -0.16; 0.23        | -0.13; 0.36 |
| NEO-Openness          | 26.1±5.7  | 0.16; 0.25             | 0.04; 0.76             | -0.12; 0.36        | 0.25; 0.06  |
| NEO-Agreeableness     | 35.5±5.0  | -0.10; 0.47            | 0.21; 0.12             | -0.09; 0.49        | 0.13; 0.34  |
| NEO-Conscientiousness | 31.8±7.3  | 0.10; 0.45             | -0.08; 0.55            | <b>-0.32; 0.02</b> | 0.15; 0.28  |
| BIS                   | 64.2±10.8 | -0.01; 0.92            | 0.15; 0.27             | <b>0.28; 0.04</b>  | -0.11; 0.43 |
| PCS*                  | 16.5±12.2 | -0.23; 0.09            | <b>0.51; &lt;0.001</b> | <b>0.32; 0.02</b>  | 0.05; 0.74  |

Test statistic refers to independent sample t-test for dichotomous group comparisons or Pearson correlation coefficient for continuous variables. \*Indicates that one subject had missing data for the PTSD-CL5 and another subject had missing data for the PCS. RSQ, Relationship Scales Questionnaire; FND, Functional Neurological Disorder; PNES, psychogenic non-epileptic seizures; FMD, functional movement disorder; FW, functional weakness; SD, standard deviation; SOMS: CD, Conversion Disorder Subscale of the Screening for Somatoform Symptoms-7 scale; PHQ-15, Patient Health Questionnaire-15; SDQ-20, Somatoform Dissociation Questionnaire-20; SF-36; Short Form Health Survey-36; DES, Dissociative Experience Scale; PTSD-CL5, Post-Traumatic Stress Disorder Checklist for DSM-5; LEC, Life Events Checklist; CTQ, Childhood Trauma Questionnaire; BDI-II, Beck Depression Inventory-II; STAI-T, Spielberger State Trait Anxiety Inventory Total Score; CD-RISC, Connor-Davidson Resilience Scale; TAS, Toronto Alexithymia Score; NEO, NEO Five-Factor Inventory-3; BI, Barrett Impulsivity Scale; PCS, Pain Catastrophizing Scale.
